# Supplementary material
Source: MDPI journal article supplement (https://www.mdpi.com/2624-5647/6/1/3)
Supplement: s1 [file s1]

Supplementary materials for

**Bleeding and perforation complications after follow-up colonoscopies in FIT-based colorectal cancer screening: Insights from a retrospective case-control study**

**Supplementary Table S1.** Number of colonoscopies, rates of colonoscopy-related bleeding and perforation during the study period (2013-2019)

| <b>Year of index colonoscopy</b> | <b>Number of colonoscopies</b> | <b>Number of bleeding events</b> | <b>% bleeding [95% CI]</b> | <b>Number of perforation events</b> | <b>% perforation</b> |
|----------------------------------|--------------------------------|----------------------------------|----------------------------|-------------------------------------|----------------------|
| 2013                             | 847                            | 8                                | 0.94 [0.41 – 1.85]         | 2                                   | 0.24 [0.03 – 0.85]   |
| 2014                             | 15133                          | 152                              | 1.00 [0.85 – 1.18]         | 10                                  | 0.07 [0.03 – 0.12]   |
| 2015                             | 13131                          | 142                              | 1.08 [0.91 – 1.27]         | 15                                  | 0.11 [0.06– 0.19]    |
| 2016                             | 12525                          | 116                              | 0.93 [0.77 – 1.11]         | 6                                   | 0.05 [0.02 – 0.10]   |
| 2017                             | 14544                          | 46                               | 0.32 [0.23 – 0.42]         | 11                                  | 0.08 [0.04 – 0.14]   |
| 2018                             | 11573                          | 31                               | 0.27 [0.18 – 0.38]         | 6                                   | 0.05 [0.02 – 0.11]   |
| 2019                             | 1970                           | 1                                | 0.05 [0.001 – 0.28]        | 2                                   | 0.10 [0.01 – 0.37]   |
| Total                            | 69723                          | 496                              | 0.71 [0.65 – 0.78]         | 52                                  | 0.07 [0.06 – 0.10]   |

**Supplementary Table S2.** Numbers and percentages of bleeding and perforation events by interval between index colonoscopy and occurrence of the complication.

| <b>Interval<br/>(day)</b> | <b>Cumulative<br/>number of<br/>bleeding events</b> | <b>Cumulative<br/>% Bleeding<br/>(N = 496)</b> | <b>Cumulative<br/>number of<br/>perforation events</b> | <b>Cumulative<br/>% Perforation<br/>(N = 52)</b> |
|---------------------------|-----------------------------------------------------|------------------------------------------------|--------------------------------------------------------|--------------------------------------------------|
| 0                         | 345                                                 | 69,56                                          | 24                                                     | 46,15                                            |
| 1                         | 398                                                 | 80,24                                          | 34                                                     | 65,38                                            |
| 2                         | 421                                                 | 84,88                                          | 43                                                     | 82,69                                            |
| 3                         | 428                                                 | 86,29                                          | 44                                                     | 84,62                                            |
| 4                         | 437                                                 | 88,10                                          | 44                                                     | 84,62                                            |
| 5                         | 444                                                 | 89,52                                          | 47                                                     | 90,38                                            |
| 6                         | 454                                                 | 91,53                                          | 47                                                     | 90,38                                            |
| 7                         | 467                                                 | 94,15                                          | 47                                                     | 90,38                                            |
| 8                         | 471                                                 | 94,96                                          | 48                                                     | 92,31                                            |
| 9                         | 480                                                 | 96,77                                          | 49                                                     | 94,23                                            |
| 10                        | 487                                                 | 98,19                                          | 50                                                     | 96,15                                            |
| 11                        | 489                                                 | 98,59                                          | 50                                                     | 96,15                                            |
| 12                        | 490                                                 | 98,79                                          | 50                                                     | 96,15                                            |
| 13                        | 493                                                 | 99,40                                          | 51                                                     | 98,08                                            |
| 14                        | 496                                                 | 100,00                                         | 52                                                     | 100,00                                           |

**Supplementary Table S3. List of nomenclature codes used to identify bleeding and perforation within 14 days after colonoscopy**

| Nomenclature code  | Description                                                                                                                                                                                                                                                                                                                                                                                                           |
|--------------------|-----------------------------------------------------------------------------------------------------------------------------------------------------------------------------------------------------------------------------------------------------------------------------------------------------------------------------------------------------------------------------------------------------------------------|
| <i>Bleeding</i>    |                                                                                                                                                                                                                                                                                                                                                                                                                       |
| 473771-473782      | Haemostasis in urgency, for digestive bleeding, with decrease in haemoglobin level of more than 2 g or need for transfusion (before 1/11/2016)/<br>Haemostasis of the digestive tract, by endoscopy (after 1/11/2016)                                                                                                                                                                                                 |
| 453235-453246      | Digital angiography of the thoracic and/or abdominal aorta and its branches                                                                                                                                                                                                                                                                                                                                           |
| 589131-589142      | Percutaneous occlusion under the control of medical imaging of the arterial or venous vascularization of pathological lesions or of arterial bleeding in the facial, thoracic, abdominal or pelvic region, including the manipulations and controls during the treatment and the catheters used, excluding the embolization catheter(s) used, the pharmaceuticals, the contrast agents and the embolization equipment |
| <i>Perforation</i> |                                                                                                                                                                                                                                                                                                                                                                                                                       |
| 243611-243622      | Surgery for perforation of an abdominal organ other than the appendix                                                                                                                                                                                                                                                                                                                                                 |
| 474810-474821      | Treatment of a fistula or perforation of the digestive tract, by endoscopy                                                                                                                                                                                                                                                                                                                                            |

**Supplementary Table S4. List of nomenclature codes used to identify anaesthesia**

| <b>Nomenclature code</b> | <b>Description</b>                                                                                                                                       |
|--------------------------|----------------------------------------------------------------------------------------------------------------------------------------------------------|
| 200211-200222            | Anaesthesia performed during a dispensation: Ranked in a category equal to or lower than K 180 or N 300 or I 350 and higher than K 120 or N 200 or I 250 |
| 201073-201084            | Anaesthesia performed during a dispensation: Ranked in a category lower than K 120 or N 200 or I 200 and higher than K 75 or N 125 or I 125              |
| 201110-201121            | Anaesthesia performed during a dispensation: Ranked in a category equal to or lower than K 75 or N 125 or I 125 and higher than K 24 or N 40 or I 40     |
| 201132-201143            | Anaesthesia performed during a dispensation: Ranked in a category equal to or lower than K 24 or N 40 or I 40                                            |
| 200196-200200            | Anaesthesia performed during a dispensation: Ranked in a category equal to or lower than K 240 or N 400 or I 450 and higher than K 180 or N 300 or I 350 |

**Supplementary Table S5.** List of nomenclature codes used to identify polypectomy

| Nomenclature code | Description                                                                                              |
|-------------------|----------------------------------------------------------------------------------------------------------|
| 473955-473966     | Excision of one or more polyps from the colon, ileum, or jejunum, by endoscopy and with a diathermy loop |
| 473211-473222     | Excision of one or more polyps in the colon, ileum, or jejunum, by endoscopy and with a diathermy loop   |
| 244370-244381     | Endoscopic removal of benign tumors or polyps of the sigmoid, per session                                |
| 244355-244366     | Removal of benign tumors or polyps from the rectum, including rectoscopy, per session                    |
| 473756-473760     | Ileoscopy with removal of tumors and/or coagulation of lesions                                           |

**Supplementary Table S6. List of antiplatelet/antithrombotic drugs**

| <b>Group</b>                        | <b>Drug</b>                                                                                                                                                                                                                                   |
|-------------------------------------|-----------------------------------------------------------------------------------------------------------------------------------------------------------------------------------------------------------------------------------------------|
| <b>Antiplatelet</b>                 | acetylsalicylic acid, clopidogrel, prasugrel, ticlopidine, cangrelor, ticagrelor, dipyridamole, epoprostenol, eptifibatide, tirofiban                                                                                                         |
| <b>NSAIDs</b>                       | aceclofenac, diclofenac, ketorolac, ibuprofen, ketoprofen, naproxen, indometacine, meloxicam, piroxicam, tenoxicam, celecoxib, etoricoxib, nabumeton                                                                                          |
| <b>Anticoagulant</b>                | acenocoumarol, phenprocoumon, warfarin, apixaban, dabigatran, edoxaban, rivaroxaban, heparin, dalteparin, enoxaparin, nadroparin, tinzaparin, danaparoid, bivalirudin, fondaparinux, protein C [human plasma], antitrombin III [human plasma] |
| <b>Thrombolytics</b>                | alteplase, tenecteplase, urokinase                                                                                                                                                                                                            |
| <b>Other anti-thrombotic agents</b> | caplacizumab                                                                                                                                                                                                                                  |
